# Supplementary material
Source: PubMed Central journal article supplement (PMC5723545)
Supplement: NIHMS906526-supplement-supplement_1.pdf [file NIHMS906526-supplement-supplement_1.pdf]

1 **Online Supplement:** Multivariable association between HRQoL status and asthma control status by the  
 2 use of different time points

| Consistently Fair/Poor HRQoL | Odds Ratio of Consistently Poor Asthma Control <sup>a</sup> |                                                |                                             |                                       |
|------------------------------|-------------------------------------------------------------|------------------------------------------------|---------------------------------------------|---------------------------------------|
|                              | 3 time points of HRQoL (T1,T2,T4) <sup>b</sup>              | 3 time points of HRQoL (T1,T3,T4) <sup>b</sup> | 2 time points of HRQoL (T1,T4) <sup>c</sup> | 1 time point of HRQoL (T1 – Baseline) |
| <b>Asthma Impact</b>         | 4.39 (p<0.001)                                              | 4.20 (p<0.001)                                 | 3.87 (p<0.01)                               | 3.10 (p<0.01)                         |
| <b>Pain Interference</b>     | 2.67 (p<0.05)                                               | 2.54 (p<0.05)                                  | 2.27 (p<0.05)                               | 1.36 (p=0.41)                         |
| <b>Fatigue</b>               | 2.50 (p<0.05)                                               | 2.17 (p<0.05)                                  | 1.77 (p=0.14)                               | 1.33 (p=0.44)                         |
| <b>Depressive Symptoms</b>   | 2.26 (p<0.05)                                               | 2.75 (p<0.01)                                  | 2.39 (p<0.01)                               | 3.40 (p<0.01)                         |
| <b>Anxiety</b>               | 1.82 (p=0.10)                                               | 2.32 (p<0.05)                                  | 1.57 (p=0.26)                               | 2.32 (p<0.05)                         |
| <b>Mobility</b>              | 3.35 (p<0.01)                                               | 3.07 (p<0.01)                                  | 4.69 (p<0.001)                              | 2.34 (p=0.07)                         |
| <b>Peer Relationships</b>    | 2.46 (p<0.05)                                               | 2.68 (p<0.05)                                  | 1.91 (p=0.08)                               | 1.56 (p=0.33)                         |

3 a: Controlling for child age, overweight, parent's age, and marital status.

4 b: Classifying consistently good HRQoL across three time points (T1,T2,T4 or T1,T3,T4) as "Good,  
 5 Good, Good", "Good, Good, Fair/poor", "Good, Fair/poor, Good", and "Fair/poor, Good, Good" as well  
 6 as consistently Fair/poor HRQoL as "Fair/poor, Good, Fair/poor", "Fair/poor, Fair/poor, Good", "Good,  
 7 Fair/poor, Fair/poor", and "Fair/poor, Fair/poor, Fair/poor".

8 c: Classifying good HRQoL across two time points (T1,T4) as "Good, Good", "Good, Fair/poor", and  
 9 "Fair/poor, Good" as well as Fair/poor HRQoL as "Fair/poor, Fair/poor".

10
